# Supplementary material for: Psychosocial health and quality of life in ICSI and naturally conceived adolescents: a cross-sectional comparison
Source: Springer Nature journal article supplement (doi:10.1007/s11136-023-03382-5), 2023-03-16
Supplement: MOESM1 [file 24635572]

**Supplemental Table.** Comparison of psychosocial health and quality of life in ICSI-conceived adolescents versus naturally conceived controls using adjusted linear regression models after multiple imputation – only singletons

|                                             | Model 1:<br>ICSI - NC<br>No adjustment |                      |              | Model 2:<br>ICSI - NC<br>Adjustment for<br>socioeconomic<br>and parental factors <sup>a</sup> |                      |              | Model 3:<br>ICSI - NC<br>Adjustment for<br>socioeconomic<br>and parental factors <sup>a</sup><br>and adolescent factors <sup>b</sup> |                      |              |
|---------------------------------------------|----------------------------------------|----------------------|--------------|-----------------------------------------------------------------------------------------------|----------------------|--------------|--------------------------------------------------------------------------------------------------------------------------------------|----------------------|--------------|
|                                             | Mean                                   | 95 %-CI              | p            | Mean                                                                                          | 95 %-CI              | p            | Mean                                                                                                                                 | 95 %-CI              | p            |
| <b>Psychosocial health: SDQ</b>             |                                        |                      |              |                                                                                               |                      |              |                                                                                                                                      |                      |              |
| Total difficulties (0-40 scale)             | <b>-0.8</b>                            | <b>-1.4 to -0.1</b>  | <b>0.016</b> | -0.8                                                                                          | <b>-1.5 to -0.1</b>  | 0.028        | -0.7                                                                                                                                 | -1.3 to 0.01         | 0.054        |
| Emotional problems (0-10 scale)             | <b>-0.4</b>                            | <b>-0.7 to -0.03</b> | <b>0.033</b> | -0.4                                                                                          | -0.7 to 0.01         | 0.057        | -0.3                                                                                                                                 | -0.6 to 0.03         | 0.071        |
| Conduct problems (0-10 scale)               | -0.1                                   | -0.3 to 0.04         | 0.150        | -0.1                                                                                          | -0.3 to 0.1          | 0.223        | -0.1                                                                                                                                 | -0.3 to 0.1          | 0.352        |
| Peer problems (0-10 scale)                  | 0.1                                    | -0.2 to 0.3          | 0.605        | 0.0                                                                                           | -0.2 to 0.3          | 0.922        | 0.0                                                                                                                                  | -0.2 to 0.3          | 0.764        |
| Hyperactivity (0-10 scale)                  | <b>-0.4</b>                            | <b>-0.6 to -0.1</b>  | <b>0.009</b> | <b>-0.3</b>                                                                                   | <b>-0.6 to -0.04</b> | 0.028        | <b>-0.3</b>                                                                                                                          | <b>-0.6 to -0.01</b> | <b>0.042</b> |
| Prosocial behaviour (0-10 scale)            | 0.0                                    | -0.2 to 0.3          | 0.763        | 0.1                                                                                           | -0.2 to 0.3          | 0.700        | 0.1                                                                                                                                  | -0.2 to 0.3          | 0.689        |
| Impact (0-10 scale)                         | <b>-0.2</b>                            | <b>-0.3 to -0.04</b> | <b>0.009</b> | -0.1                                                                                          | -0.3 to 0.01         | 0.061        | -0.1                                                                                                                                 | -0.2 to 0.02         | 0.103        |
| <b>Quality of life: KINDL (0-100 scale)</b> |                                        |                      |              |                                                                                               |                      |              |                                                                                                                                      |                      |              |
| Total score                                 | <b>2.3</b>                             | <b>0.7 to 3.9</b>    | <b>0.005</b> | <b>2.4</b>                                                                                    | <b>0.6 to 4.1</b>    | <b>0.008</b> | <b>2.3</b>                                                                                                                           | <b>0.6 to 4.0</b>    | <b>0.007</b> |
| Physical wellbeing                          | <b>3.3</b>                             | <b>0.5 to 6.1</b>    | <b>0.021</b> | <b>3.4</b>                                                                                    | <b>0.3 to 6.5</b>    | <b>0.030</b> | <b>3.3</b>                                                                                                                           | <b>0.4 to 6.2</b>    | <b>0.026</b> |
| Psychological wellbeing                     | <b>2.1</b>                             | <b>0.2 to 4.0</b>    | <b>0.030</b> | 1.9                                                                                           | -0.2 to 3.9          | 0.072        | 1.6                                                                                                                                  | -0.4 to 3.6          | 0.126        |
| Self esteem                                 | <b>2.8</b>                             | <b>0.3 to 5.3</b>    | <b>0.028</b> | <b>3.4</b>                                                                                    | <b>0.6 to 6.1</b>    | <b>0.015</b> | <b>3.4</b>                                                                                                                           | <b>0.8 to 6.0</b>    | <b>0.010</b> |
| Family                                      | 0.2                                    | -1.8 to 2.2          | 0.851        | 0.0                                                                                           | -2.2 to 2.2          | 0.994        | 0.0                                                                                                                                  | -2.2 to 2.1          | 0.246        |
| Friends                                     | 1.1                                    | -1.1 to 3.3          | 0.343        | 1.4                                                                                           | -1.0 to 3.8          | 0.242        | 1.4                                                                                                                                  | -1.0 to 3.8          | 0.967        |
| School                                      | <b>4.4</b>                             | <b>1.7 to 7.0</b>    | <b>0.001</b> | <b>4.4</b>                                                                                    | <b>1.5 to 7.4</b>    | <b>0.003</b> | <b>4.6</b>                                                                                                                           | <b>1.6 to 7.5</b>    | <b>0.002</b> |

ICSI – NC: Difference between adolescents conceived with intrazytoplasmatic sperm injection and adolescents conceived naturally

<sup>a</sup> parental and socioeconomic factors were age of the mother at birth, the highest school degree of mother, if the mother is living single or with a partner and the family's monthly net income

<sup>b</sup> adolescent factors were age at time of study, sex, type of secondary school, physical exercise, smoking, alcohol consumption, body mass index category, presence of severe physical disease and presence of severe psychological disease

**Bold** indicates that the 95 % confidence interval does not contain 0.
